# Supplementary material for: Suppression of OCT-1 in Metastatic Breast Cancer Cells Reduces Tumor Metastatic Potential, Hypoxia Resistance, and Drug Resistance
Source: MDPI journal article supplement (doi:10.3390/life12091435), 2022-09-15
Supplement: s1 [file s1]

**Suppression of OCT-1 in metastatic breast cancer cells reduces tumor metastatic potential, hypoxia resistance, and drug resistance**

Alexander G. Stepchenko, Elizaveta V. Bulavkina, Tatiana N. Portseva, Sofia G. Georgieva, and Elizaveta V. Pankratova

Figure S1. Analysis of changes in OCT-1 protein and mRNA expression upon knockdown.

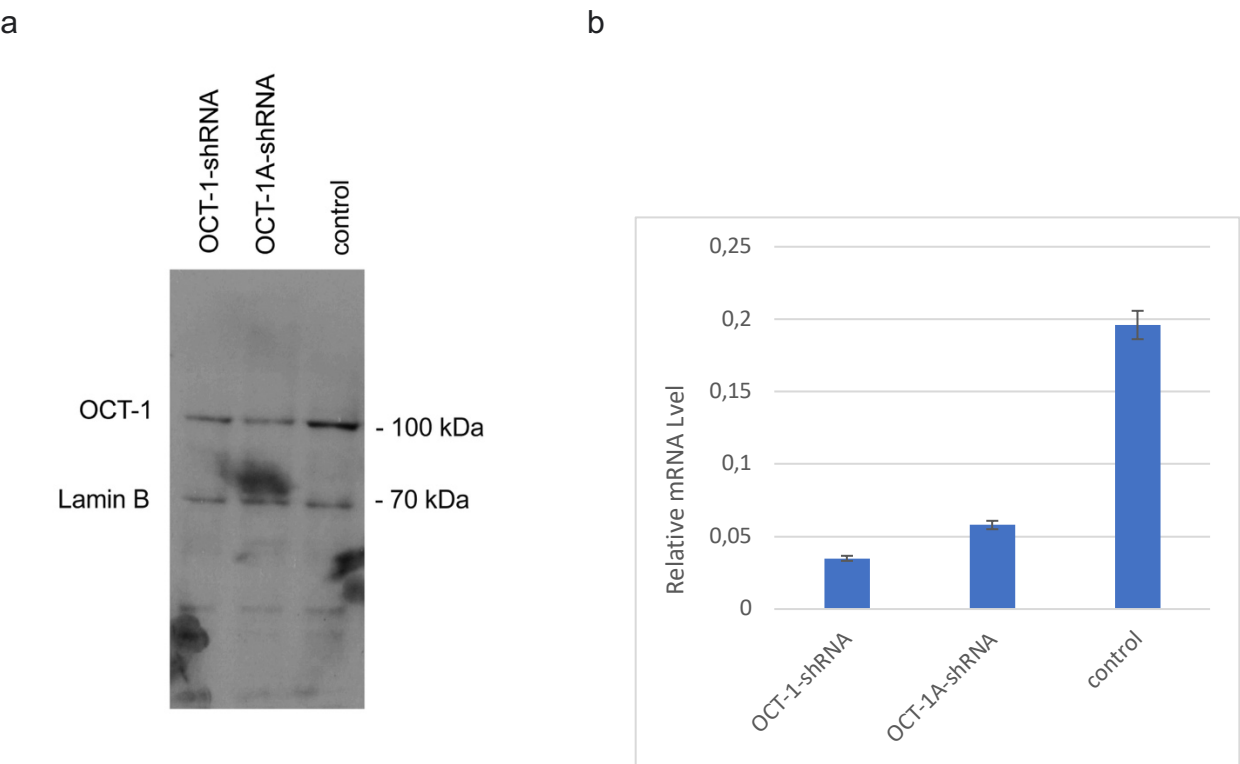

- (a) Western-blot. OCT-1 (~100 kDa), Lamin B (68 kDa). OCT-1-shRNA – total Oct-1 knockdown, OCT-1A-shRNA – isoform Oct-1A knockdown.
- (b) Real-Time PCR analysis. The relative OCT-1 mRNA level in the OCT-1 knock-down and control MDA-MB231 cells.

Oct-1 protein level.  
Densitometry (reading/intensity ratio of each band).

|         | OCT-1-shRNA | OCT-1A-shRNA | control |
|---------|-------------|--------------|---------|
| OCT-1   | 0.17        | 0.185        | 1.0     |
| Lamin B | 0.96        | 0.98         | 1.0     |
| ratio   | 0.177       | 0.18         | 1       |

Figure S2. The OCT-1 knockdown and apoptosis induction in MDA-MB231 cells.

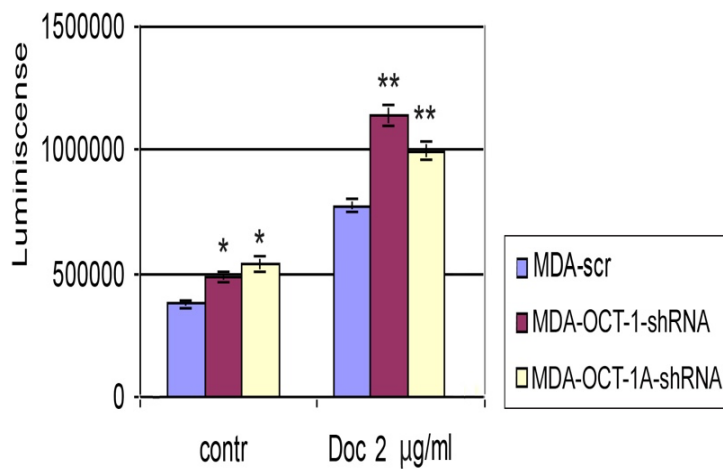

#### Determination of apoptosis by Bioluminescence caspase 3/7 assay (Promega)

The effect of OCT-1 knockdown on the level of apoptosis in MDA-MB231 cells: MDA-scr - cells transduced with the control "empty" lentivirus construct; MDA-OCT-1-shRNA - cells transduced with the lentivirus construct encoding the shRNA targeting total OCT-1 (POU2F1) protein; MDA-OCT-1A-shRNA - cells transduced with the lentivirus construct encoding the shRNA targeting the Oct-1A isoform.

Apoptosis was verified by Bioluminescence caspase 3/7 assay (Promega). MDA-MB231 cells were plated at 20 000 cells/well in 96-well plates in the final media volume of 100 µl. and treated with docetaxel (2 µg/ml) for 18 h or left untreated (control). Apoptosis was measured by a bioluminescent caspase assay (Promega). Caspase-Glo-3/7 Reagent was added to the wells and incubated at room temperature for 60 min. The luminescence of each sample was measured in a plate-reading luminometer as directed by the luminometer manufacturer. Results were plotted as signal-to-noise ratios. Background readings were determined from wells containing culture medium without cells. The graphs show means  $\pm$  S.E.M. of three independent experiments. *t*-tests have been performed to compare the means. The asteriks indicate a *P* value relative to the control MDA-MB231 cells value. (\**P* < 0.05, and \*\**P* < 0.01).
